# Supplementary material
Source: Elsevier journal article supplement (https://www.sciencedirect.com/science/article/pii/S0300893215000688)
Supplement: mmc1 [file mmc1.pdf]

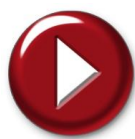

**Material suplementario**

---

**Asociación entre variantes genéticas de enfermedad coronaria y aterosclerosis subclínica: estudio de asociación y metanálisis**

Michel Zabalza<sup>a,b,c</sup>, Isaac Subirana<sup>b,d</sup>, Carla Lluís-Ganella<sup>b</sup>, Sergi Sayols-Baixeras<sup>b</sup>, Eric de Groot<sup>e,f</sup>, Roman Arnold<sup>g</sup>, Ana Cenarro<sup>h</sup>, Rafel Ramos<sup>i,c</sup>, Jaume Marrugat<sup>b</sup> y Roberto Elosua<sup>b,\*</sup>

<sup>a</sup> *Servicio de Cardiología, Hospital Universitario Josep Trueta, Girona, España*

<sup>b</sup> *Grupo de Epidemiología y Genética Cardiovascular, IMIM (Instituto Hospital del Mar de Investigaciones Médicas), Barcelona, España*

<sup>c</sup> *Facultad de Medicina, Universidad de Girona, Girona, España*

<sup>d</sup> *CIBER de Epidemiología y Salud Pública, Barcelona, España*

<sup>e</sup> *Academic Medical Center, Thoracic Surgery, Ámsterdam, Países Bajos*

<sup>f</sup> *Imagelab Online & Cardiovascular, Science Park, Matrix II, 1.08, Ámsterdam, Países Bajos*

<sup>g</sup> *ICICORELAB, Hospital Clínico Universitario, Valladolid, España*

<sup>h</sup> *Laboratorio de Investigación Molecular, Hospital Universitario Miguel Servet, Instituto de Investigación Sanitaria de Aragón, Zaragoza, España*

<sup>i</sup> *Unidad de Investigación en Atención Primaria, Institut d'Investigació en Atenció Primària (IDIAP) Jordi Gol, y Unidad Docente de Medicina de Familia de Girona, Institut Català de la Salut (ICS), Girona, España*

---

**Table 1, Supplementary Material.**

Age- and Sex-adjusted Mean and Standard Deviation of the Mean and Maximum Carotid Bulb and Internal Carotid Artery Intima Media Thickness Across the Groups Defined by the Genotypes Studied

| Genetic variant                        | Mean IMTbul |             | Maximum IMTbul |             | Mean IMTica |             | Maximum IMTica |             |
|----------------------------------------|-------------|-------------|----------------|-------------|-------------|-------------|----------------|-------------|
| <b>Single Nucleotide Polymorphisms</b> |             |             |                |             |             |             |                |             |
| <b>rs17465637</b>                      |             |             |                |             |             |             |                |             |
| AA                                     | N=210       | 0.733±0.015 | N=179          | 1.024±0.029 | N=202       | 0.581±0.011 | N=163          | 0.800±0.020 |
| AC                                     | N=1020      | 0.765±0.007 | N=904          | 1.052±0.013 | N=1000      | 0.593±0.005 | N=853          | 0.796±0.009 |
| CC                                     | N=1248      | 0.766±0.006 | N=1105         | 1.051±0.012 | N=1222      | 0.593±0.005 | N=1036         | 0.799±0.008 |
| <i>P Value</i>                         | .122        |             | .657           |             | .579        |             | .948           |             |
| <b>rs6725887</b>                       |             |             |                |             |             |             |                |             |
| CC                                     | N=45        | 0.770±0.032 | N=41           | 1.118±0.060 | N=44        | 0.624±0.024 | N=38           | 0.845±0.041 |
| CT                                     | N=611       | 0.765±0.009 | N=548          | 1.047±0.016 | N=602       | 0.600±0.007 | N=498          | 0.812±0.011 |
| TT                                     | N=1779      | 0.759±0.005 | N=1561         | 1.045±0.010 | N=1737      | 0.589±0.004 | N=1483         | 0.792±0.007 |
| <i>P Value</i>                         | .808        |             | .488           |             | .163        |             | .179           |             |
| <b>rs9818870</b>                       |             |             |                |             |             |             |                |             |
| CC                                     | N=1843      | 0.762±0.005 | N=1645         | 1.047±0.009 | N=1802      | 0.592±0.004 | N=1531         | 0.796±0.007 |
| CT                                     | N=578       | 0.764±0.009 | N=497          | 1.051±0.017 | N=567       | 0.593±0.007 | N=472          | 0.804±0.012 |
| TT                                     | N=34        | 0.720±0.037 | N=28           | 1.016±0.073 | N=33        | 0.612±0.028 | N=31           | 0.822±0.046 |
| <i>P Value</i>                         | .525        |             | .895           |             | .786        |             | .706           |             |
| <b>rs12526453</b>                      |             |             |                |             |             |             |                |             |
| CC                                     | N=1018      | 0.764±0.007 | N=909          | 1.053±0.013 | N=995       | 0.593±0.005 | N=835          | 0.806±0.009 |
| CG                                     | N=1124      | 0.758±0.006 | N=990          | 1.037±0.012 | N=1103      | 0.590±0.005 | N=949          | 0.787±0.008 |
| GG                                     | N=315       | 0.765±0.012 | N=273          | 1.067±0.023 | N=306       | 0.599±0.009 | N=254          | 0.813±0.01  |

|                   |        |             |        |             |        |             |        |             |
|-------------------|--------|-------------|--------|-------------|--------|-------------|--------|-------------|
|                   |        |             |        |             |        |             |        | 6           |
| <i>P Value</i>    | .824   |             | .433   |             | .720   |             | .169   |             |
| <b>rs1333049</b>  |        |             |        |             |        |             |        |             |
| CC                | N=650  | 0.768±0.009 | N=572  | 1.060±0.016 | N=636  | 0.592±0.006 | N=542  | 0.799±0.011 |
| GC                | N=1233 | 0.769±0.006 | N=1095 | 1.060±0.012 | N=1207 | 0.595±0.005 | N=1013 | 0.802±0.008 |
| GG                | N=595  | 0.744±0.009 | N=521  | 1.013±0.017 | N=581  | 0.586±0.007 | N=498  | 0.787±0.011 |
| <i>P Value</i>    | .067   |             | .048   |             | .536   |             | .564   |             |
| <b>rs1746048</b>  |        |             |        |             |        |             |        |             |
| CC                | N=1863 | 0.761±0.005 | N=1637 | 1.051±0.010 | N=1822 | 0.589±0.004 | N=1558 | 0.796±0.006 |
| TC                | N=560  | 0.772±0.009 | N=500  | 1.045±0.017 | N=548  | 0.603±0.007 | N=446  | 0.806±0.012 |
| TT                | N=50   | 0.725±0.031 | N=46   | 0.979±0.057 | N=49   | 0.576±0.023 | N=43   | 0.767±0.039 |
| <i>P Value</i>    | .277   |             | .444   |             | .173   |             | .573   |             |
| <b>rs9982601</b>  |        |             |        |             |        |             |        |             |
| CC                | N=1874 | 0.762±0.005 | N=1662 | 1.052±0.009 | N=1835 | 0.594±0.004 | N=1535 | 0.798±0.007 |
| CT                | N=548  | 0.763±0.009 | N=478  | 1.042±0.018 | N=538  | 0.592±0.007 | N=474  | 0.805±0.012 |
| TT                | N=32   | 0.730±0.038 | N=29   | 0.936±0.071 | N=30   | 0.548±0.029 | N=26   | 0.719±0.050 |
| <i>P Value</i>    | .699   |             | .248   |             | .310   |             | .245   |             |
| <b>rs10455872</b> |        |             |        |             |        |             |        |             |
| AA                | N=2116 | 0.758±0.005 | N=1872 | 1.041±0.009 | N=2070 | 0.590±0.004 | N=1747 | 0.793±0.006 |
| GA                | N=371  | 0.791±0.011 | N=324  | 1.094±0.021 | N=364  | 0.604±0.009 | N=303  | 0.821±0.015 |
| GG                | N=13   | 0.767±0.061 | N=11   | 1.114±0.116 | N=12   | 0.615±0.047 | N=10   | 0.781±0.081 |

|                            |        |             |        |             |        |             |        |             |
|----------------------------|--------|-------------|--------|-------------|--------|-------------|--------|-------------|
| <b><i>P Value</i></b>      | .027   |             | .061   |             | .271   |             | .207   |             |
| <b>ALOX5AP Haplotype B</b> |        |             |        |             |        |             |        |             |
| 0*                         | N=1433 | 0.763±0.006 | N=1262 | 1.049±0.011 | N=1401 | 0.593±0.004 | N=1195 | 0.798±0.007 |
| 1*                         | N=899  | 0.764±0.007 | N=804  | 1.051±0.014 | N=880  | 0.589±0.005 | N=735  | 0.799±0.009 |
| 2*                         | N=157  | 0.754±0.018 | N=131  | 1.041±0.034 | N=154  | 0.598±0.013 | N=130  | 0.786±0.022 |
| <b><i>P Value</i></b>      | .875   |             | .966   |             | .726   |             | .871   |             |

IMTbul, carotid bulb intima-media thickness; IMTica, internal carotid intima-media thickness

\*Number of risk alleles (AGA)

**Table 2, Supplementary Material.**

Summary of Results of the Process of Selecting Manuscripts for Inclusion in the Meta-analysis According to the PRISMA Statement

| <b>Number of Manuscripts Including Each SNP</b> |                                             |                                                          |                                                 |                                         |                                        |
|-------------------------------------------------|---------------------------------------------|----------------------------------------------------------|-------------------------------------------------|-----------------------------------------|----------------------------------------|
|                                                 | <b>Identified Through the PubMed Search</b> | <b>Initially Selected After Title-abstract Screening</b> | <b>Excluded After Review of Full Manuscript</b> | <b>Identified Through Other Sources</b> | <b>Total Included in Meta-analysis</b> |
| <b>rs17465637</b>                               | 2                                           | 1                                                        | 1 <sup>1</sup>                                  | 2                                       | 2 <sup>2,3</sup>                       |
| <b>rs6725887</b>                                | 0                                           | 0                                                        | 0                                               | 2                                       | 2 <sup>2,3</sup>                       |
| <b>rs9818870</b>                                | 29                                          | 0                                                        | 0                                               | 2                                       | 2 <sup>2,3</sup>                       |
| <b>rs12526453</b>                               | 1                                           | 0                                                        | 0                                               | 2                                       | 2 <sup>2,3</sup>                       |
| <b>rs1746048*</b>                               | 78                                          | 2                                                        | 1 <sup>4</sup>                                  | 2                                       | 3 <sup>2,3,5</sup>                     |
| <b>rs9982601</b>                                | 0                                           | 0                                                        | 0                                               | 2                                       | 2 <sup>2,3</sup>                       |
| <b>rs1333049†</b>                               | 124                                         | 7                                                        | 2 <sup>6,7</sup>                                | 2                                       | 7 <sup>2,3,8-12</sup>                  |
| <b>rs10455872</b>                               | 2                                           | 1                                                        | 0                                               | 0                                       | 1 <sup>13</sup>                        |

SNP, single nucleotide polymorphisms.

\*Some studies analyzed the SNP rs501120 in linkage disequilibrium (LD) with rs1746048

†Some studies analyzed the SNP rs4977574 in LD with rs1333049

**Table 3, Supplementary Material.**

Results of the Association Between the Different Genetic Variants Included in Our Study and Mean Common Carotid Intima Media Thickness in the Individual Studies Included in the Meta-analysis.

| <b>SNP</b>                                        | <b>N</b> | <b>Beta</b> | <b>SE</b> |
|---------------------------------------------------|----------|-------------|-----------|
| <b>rs17465637</b>                                 |          |             |           |
| <i>CAPS</i> <sup>2</sup>                          | 993      | 0.004       | 0.007     |
| <i>KORA</i> <sup>2</sup>                          | 1552     | -0.002      | 0.005     |
| <i>YFS</i> <sup>3</sup> ( <i>rs17011666</i> )     | 2015     | 0.001       | 0.004     |
| <i>REGICOR</i>                                    | 2116     | 0.010       | 0.004     |
| <b>rs6725887</b>                                  |          |             |           |
| <i>CAPS</i> <sup>2</sup>                          | 993      | -0.027      | 0.009     |
| <i>KORA</i> <sup>2</sup>                          | 1552     | -0.024      | 0.006     |
| <i>YFS</i> <sup>2</sup>                           | 2425     | -0.002      | 0.004     |
| <i>Bogalusa</i> <sup>3</sup>                      | 755      | -0.011      | 0.011     |
| <i>REGICOR</i>                                    | 2076     | -0.007      | 0.006     |
| <b>rs9818870</b>                                  |          |             |           |
| <i>CAPS</i> <sup>2</sup>                          | 993      | 0.008       | 0.008     |
| <i>KORA</i> <sup>2</sup>                          | 1552     | 0.003       | 0.006     |
| <i>YFS</i> <sup>2</sup>                           | 2425     | 0.004       | 0.005     |
| <i>REGICOR</i>                                    | 2096     | -0.007      | 0.006     |
| <b>rs12526453</b>                                 |          |             |           |
| <i>CAPS</i> <sup>2</sup>                          | 993      | -0.002      | 0.007     |
| <i>KORA</i> <sup>2</sup>                          | 1552     | 0.004       | 0.004     |
| <i>YFS</i> <sup>2</sup>                           | 2425     | -0.003      | 0.003     |
| <i>Bogalusa</i> <sup>3</sup>                      | 755      | -0.020      | 0.008     |
| <i>REGICOR</i>                                    | 2096     | 0.001       | 0.004     |
| <b>rs1333049</b>                                  |          |             |           |
| <i>CAPS</i> ( <i>rs4977574</i> ) <sup>2</sup>     | 993      | -0.002      | 0.006     |
| <i>KORA</i> ( <i>rs4977574</i> ) <sup>2</sup>     | 1552     | -0.000      | 0.004     |
| <i>Bogalusa</i> ( <i>rs4977574</i> ) <sup>3</sup> | 755      | -0.004      | 0.007     |
| <i>YFS</i> <sup>8</sup>                           | 2277     | -0.001      | 0.005     |
| <i>Health 2000</i> <sup>8</sup>                   | 1295     | 0.011       | 0.011     |

*PAGE*<sup>9</sup>

|                                               |      |        |       |
|-----------------------------------------------|------|--------|-------|
| <i>European Americans</i>                     | 8418 | 0.000  | 0.002 |
| <i>African Americans</i>                      | 3299 | -0.001 | 0.006 |
| <i>American Indians</i>                       | 5411 | -0.007 | 0.004 |
| <i>Three City + EVA studies</i> <sup>10</sup> | 4097 | 0.003  | 0.002 |
| <i>Han Chinese population</i> <sup>[11]</sup> |      |        |       |
| <i>Men</i>                                    | 490  | 0.022  | 0.012 |
| <i>Women</i>                                  | 584  | 0.001  | 0.002 |
| <i>Bruneck</i> <sup>12</sup>                  | 769  | 0      | 0.010 |
| <i>REGICOR</i>                                | 2116 | -0.010 | 0.004 |

## rs1746048

|                                                     |      |       |       |
|-----------------------------------------------------|------|-------|-------|
| <i>CAPS</i> <sup>2</sup>                            | 993  | 0.007 | 0.009 |
| <i>KORA</i> <sup>2</sup>                            | 1552 | 0.003 | 0.006 |
| <i>YFS</i> <sup>2</sup>                             | 2425 | 0.002 | 0.004 |
| <i>Bogalusa</i> <sup>3</sup>                        | 755  | 0.012 | 0.011 |
| <i>Bruneck</i> <sup>5</sup> ( <i>rs501120</i> )     | 738  | 0.042 | 0.013 |
| <i>Health 2000</i> <sup>5</sup> ( <i>rs501120</i> ) | 1237 | 0.017 | 0.010 |
| <i>HTO</i> <sup>5</sup> ( <i>rs501120</i> )         | 770  | 0.011 | 0.016 |
| <i>REGICOR</i>                                      | 2111 | 0.001 | 0.006 |

## rs9982601

|                              |      |        |       |
|------------------------------|------|--------|-------|
| <i>CAPS</i> <sup>2</sup>     | 993  | -0.001 | 0.009 |
| <i>KORA</i> <sup>2</sup>     | 1552 | 0.002  | 0.006 |
| <i>YFS</i> <sup>2</sup>      | 2425 | -0.004 | 0.004 |
| <i>Bogalusa</i> <sup>3</sup> | 755  | -0.020 | 0.012 |
| <i>REGICOR</i>               | 2092 | 0.003  | 0.006 |

## rs10455872

|                               |      |        |       |
|-------------------------------|------|--------|-------|
| <i>IMPROVE</i> <sup>13*</sup> | 2984 | -0.003 | 0.002 |
| <i>KORA</i> <sup>13*</sup>    | 1552 | -0.000 | 0.011 |
| <i>REGICOR</i>                | 2140 | 0.002  | 0.007 |

\*Results are presented as an association between carotid intima-media thickness and a genetic risk score composed by two SNPs in the *LPA* gene. It is assumed that the effect of the SNP of interest represents half of the magnitude shown in the original publication.

SE, standard error; SNP, single nucleotide polymorphisms.



**Figure, Supplementary Material.**

Results of the meta-regression analyses showing that the heterogeneity between studies assessing the association between rs6725887 and carotid intima-media thickness was explained by the population mean intima-media thickness.

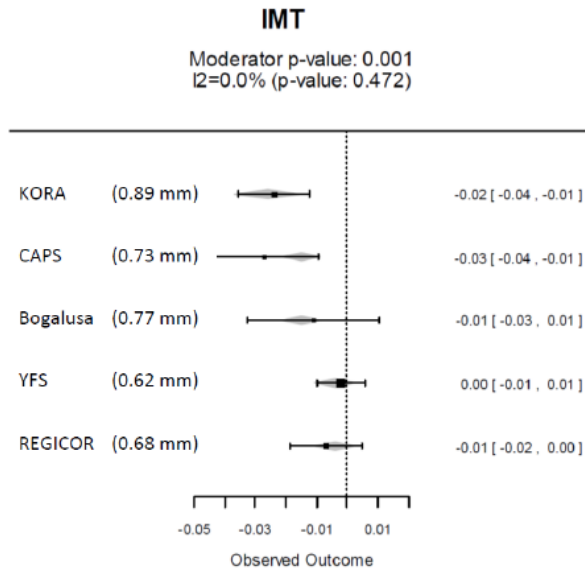

IMT, intima-media thickness

## REFERENCES

1. García-Bermúdez M, López-Mejías R, González-Juanatey C, Corrales A, Castañeda S, Miranda-Fillooy JA, et al. Association study of MIA3 rs17465637 polymorphism with cardiovascular disease in rheumatoid arthritis patients. *DNA Cell Biol.* 2012;31:1412-7.
2. Conde L, Bevan S, Sitzler M, Klopp N, Illig T, Thiery J, et al. Novel associations for coronary artery disease derived from genome wide association studies are not associated with increased carotid intima-media thickness, suggesting they do not act via early atherosclerosis or vessel remodelling. *Atherosclerosis.* 2011;219:684-9.
3. Hernesniemi JA, Seppälä I, Lyytikäinen LP, Mononen N, Oksala N, Hutri-Kähönen N, et al. Genetic Profiling Using Genome-Wide Significant Coronary Artery Disease Risk Variants Does Not Improve the Prediction of Subclinical Atherosclerosis: The Cardiovascular Risk in Young Finns Study, the Bogalusa Heart Study and the Health 2000 Survey – A Meta-Analysis of Three Independent Studies. *PLoS One.* 2012;7:e28931.
4. López-Mejías R, García-Bermúdez M, González-Juanatey C, Castañeda S, Miranda-Fillooy JA, Gómez-Vaquero C, et al. Lack of association between the CXCL12 rs501120 polymorphism and cardiovascular disease in Spanish patients with rheumatoid arthritis. *Hum Immunol.* 2012;73:543-6.
5. Kiechl S, Laxton RC, Xiao Q, Hernesniemi JA, Raitakari OT, Kähönen M, et al. Coronary artery disease-related genetic variant on chromosome 10q11 is associated with carotid intima-media thickness and atherosclerosis. *Arterioscler Thromb Vasc Biol.* 2010;30:2678-83.
6. Nambi V, Boerwinkle E, Lawson K, Brautbar A, Chambless L, Franchesini N, et al. The 9p21 genetic variant is additive to carotid intima media thickness and plaque in improving coronary heart disease risk prediction in white participants of the Atherosclerosis Risk in Communities (ARIC) Study. *Atherosclerosis.* 2012;222:135-7.
7. Cunnington MS, Mayosi BM, Hall DH, Avery PJ, Farrall M, Vickers MA, et al. Novel genetic variants linked to coronary artery disease by genome-wide association are not associated with carotid artery intima-media thickness or intermediate risk phenotypes. *Atherosclerosis.* 2009;203:41-4.
8. Samani NJ, Taitakari OT, Sipilä K, Tobin MD, Schunkert H, Juonala M, et al. Coronary artery disease-associated locus on chromosome 9p21 and early markers of atherosclerosis. *Arterioscler Thromb Vasc Biol.* 2008;28:1679-83.

9. Zhang L, Buzkova P, Wassel CL, Roman MJ, North KE, Crawford DC, et al. Lack of associations of ten candidate coronary heart disease risk genetic variants and subclinical atherosclerosis in four U.S. populations: The Population Architecture using Genomics and Epidemiology (PAGE) study. *Atherosclerosis*. 2013;228:390-9.
10. Plichart M, Empana JP, Lambert JC, Amouyel P, Tiret L, Letenneur L, et al. Single polymorphism nucleotide rs1333049 on chromosome 9p21 is associated with carotid plaques but not with common carotid intima-media thickness in older adults. A combined analysis of the Three-City and the EVA studies. *Atherosclerosis*. 2012;222:187-90.
11. Lin HF, Tsai PC, Lin RT, Khor GT, Sheu SH, Juo SH. Sex differential genetic effect of chromosome 9p21 on subclinical atherosclerosis. *PLoS One*. 2010;5:e15124.
12. Ye S, Willeit J, Kronenberg F, Xu Q, Kiechl S. Association of genetic variation on chromosome 9p21 with susceptibility and progression of atherosclerosis: a population-based, prospective study. *J Am Coll Cardiol*. 2008;52:378-84.
13. Helgadottir A, Gretarsdottir S, Thorleifsson G, Holm H, Patel RS, Gudnason T, et al. Apolipoprotein(a) genetic sequence variants associated with systemic atherosclerosis and coronary atherosclerotic burden but not with venous thromboembolism. *J Am Coll Cardiol*. 2012;60:722-9.
